# Supplementary material for: Genomes of Abundant and Widespread Viruses from the Deep Ocean
Source: PubMed Central journal article supplement (PMC4981710; doi:10.1128/mbio.00805-16), 2016-07-26
Supplement: mbo004162901sf1.pdf [file mbo004162901sf1.pdf]

uvDeep-CGR2-AD10-C281, GC% 33.8, 36.8 kb

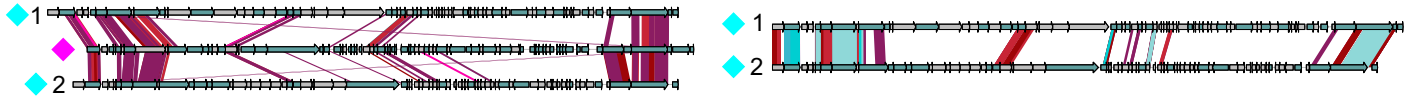

- ◆ 1. uvMED-CGR-C100-MedDCM-OCT-S33-C20, GC% 33.3, 38.2 kb
- ◆ 2. uvMED-CGR-C22-MedDCM-OCT-S33-C34, GC% 31.6, 36.7 kb

uvDeep-CGR2-KM22-C255, GC% 33, 40.4 kb

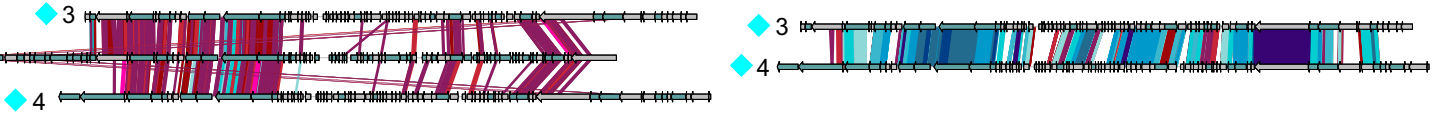

- ◆ 3. uvMED-CGF-C22A-MedDCM-OCT-S45-C35, GC% 32.6, 37.1 kb
- ◆ 4. uvMED-CGR-C22C-MedDCM-OCT-S23-C7, GC% 32.7, 39.5 kb

uvDeep-CGR2-KM24-C165, GC% 32.6, 34.3 kb

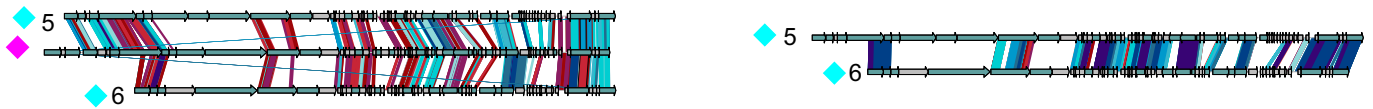

- ◆ 5. uvMED-GF-C36-MedDCM-OCT-S41-C69, GC% 32.8, 33.4 kb
- ◆ 6. uvMED-GF-C36-MedDCM-OCT-S23-C51, GC% 32.6, 29.2 kb

uvDeep-CGR2-AD8-C175, GC% 30.8, 32.8 kb

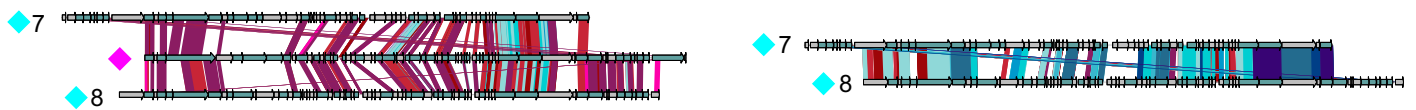

- ◆ 7. uvMED-GF-C27A-MedDCM-OCT-S26-C72, GC% 31.2, 32 kb
- ◆ 8. uvMED-CGR-C27-MedDCM-OCT-S28-C53, GC% 31.8, 32.8 kb

uvDeep-CGR2-KM19-C184, GC% 47.9, 38.9 kb

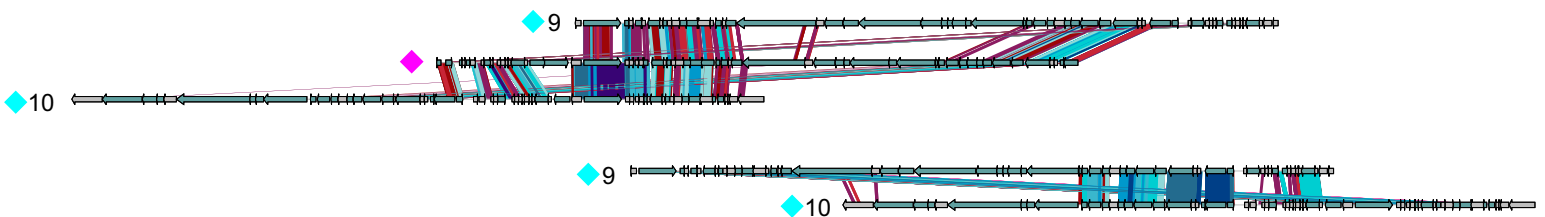

- ◆ 9. uvMED-CGR-C7A-MedDCM-OCT-S38-C7, GC% 47.2, 42.6 kb
- ◆ 10. uvMED-CGR-C7-MedDCM-OCT-S37-C8, GC% 47.7, 41.9 kb

uvDeep-CGR2-KM19-C269, GC% 30.6, 36.5 kb

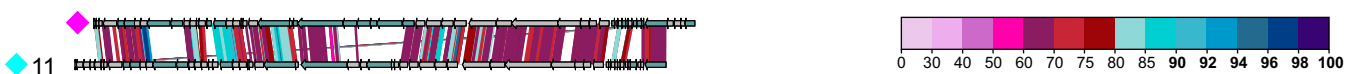

- ◆ 11. uvMED-CGR-U-MedDCM-OCT-S42-C60, GC% 30.3, 35.8 kb

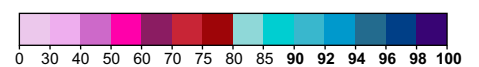

**FigS1.** Comparison between uvDeep and uvMed contigs. A few comparisons between the phages recovered from both the photic and the deep datasets are shown (tblastx). Phages from the uvMED library are indicated with a blue diamond and those from the uvDeep library with a pink diamond sign. Putative pelagiphages are indicated with orange circles.
