# Supplementary material for: Genomes of Abundant and Widespread Viruses from the Deep Ocean
Source: PubMed Central journal article supplement (PMC4981710; doi:10.1128/mbio.00805-16), 2016-07-26
Supplement: mbo004162901sf2.pdf [file mbo004162901sf2.pdf]

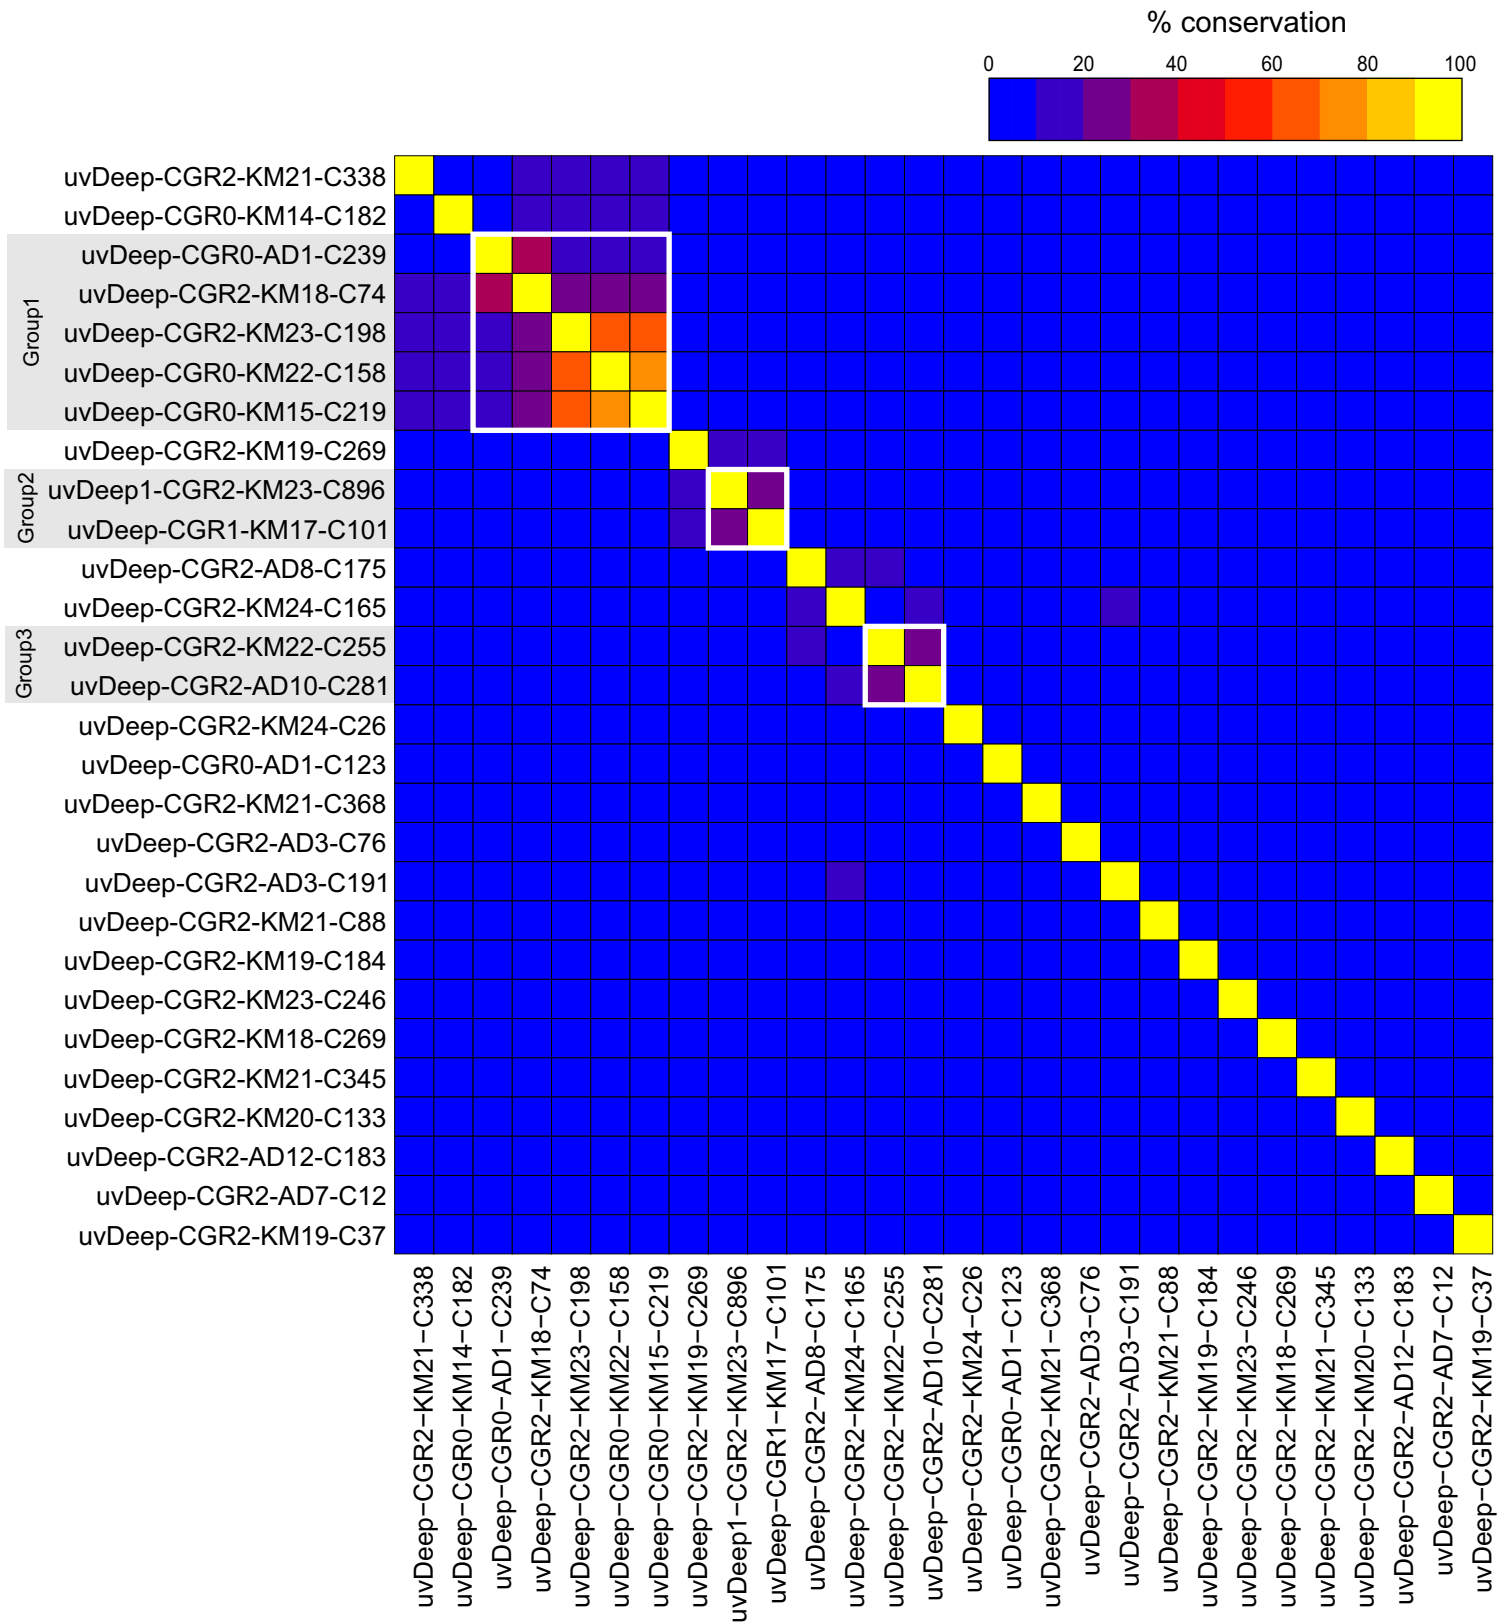

**FigS2.** Heatmap of an all-vs-all protein comparison of all complete uvDeep genomes. A color scale representing percentage conservation is shown at top right. The three groups, with >20% conserved proteins (Group1,Group2 and Group3) are highlighted in white squares within the matrix and labelled.
