# Supplementary material for: Genomes of Abundant and Widespread Viruses from the Deep Ocean
Source: PubMed Central journal article supplement (PMC4981710; doi:10.1128/mbio.00805-16), 2016-07-26
Supplement: mbo004162901sf5.pdf [file mbo004162901sf5.pdf]

a

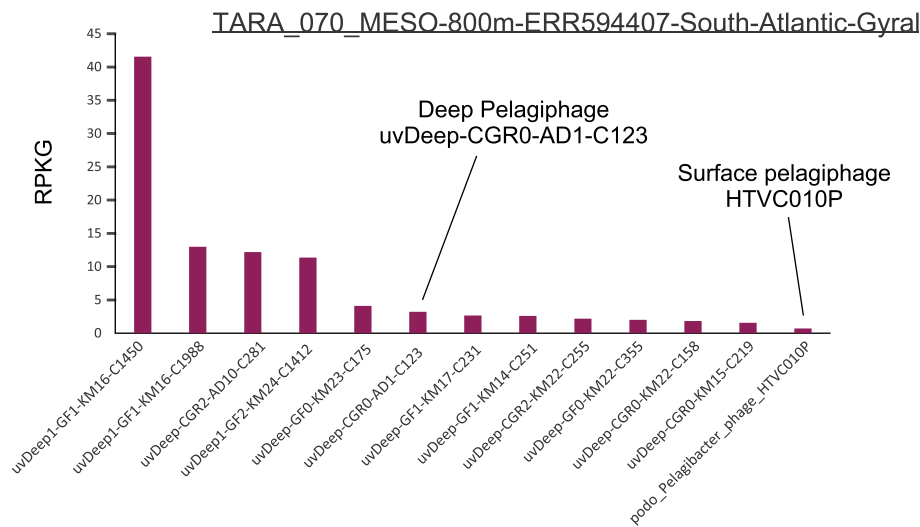

b

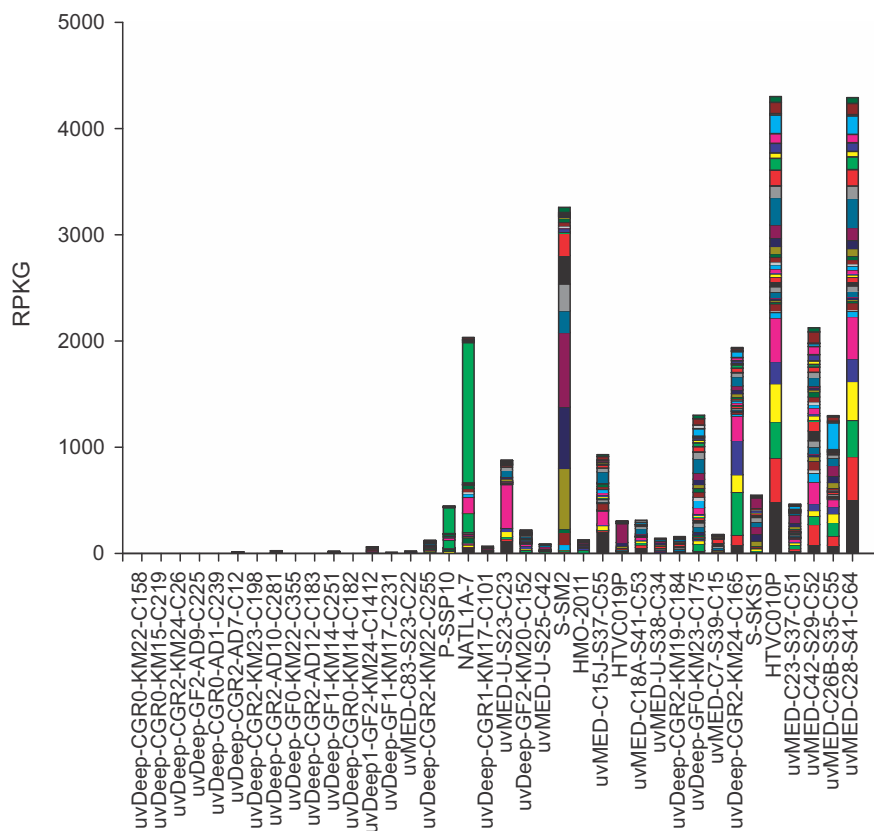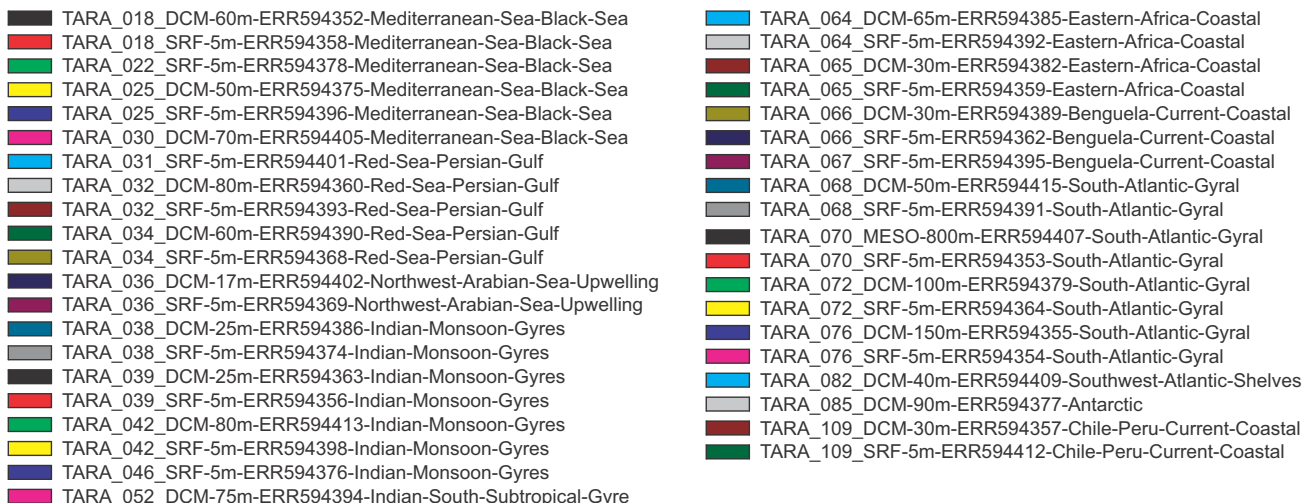

**FigS5.** a) Comparative fragment recruitment of top recruiting uvDeep phages (including deep pelagiphage) vs surface pelagiphage HTVC010P versus the Tara Virome mesopelagic dataset from a depth of 800m. b) Comparative recruitment of uvDeep genomes and other references from TARA viromes. The phage genomes are arranged exactly as in Figure 3a
