# Supplementary material for: Genomes of Abundant and Widespread Viruses from the Deep Ocean
Source: PubMed Central journal article supplement (PMC4981710; doi:10.1128/mbio.00805-16), 2016-07-26
Supplement: mbo004162901sf6.pdf [file mbo004162901sf6.pdf]

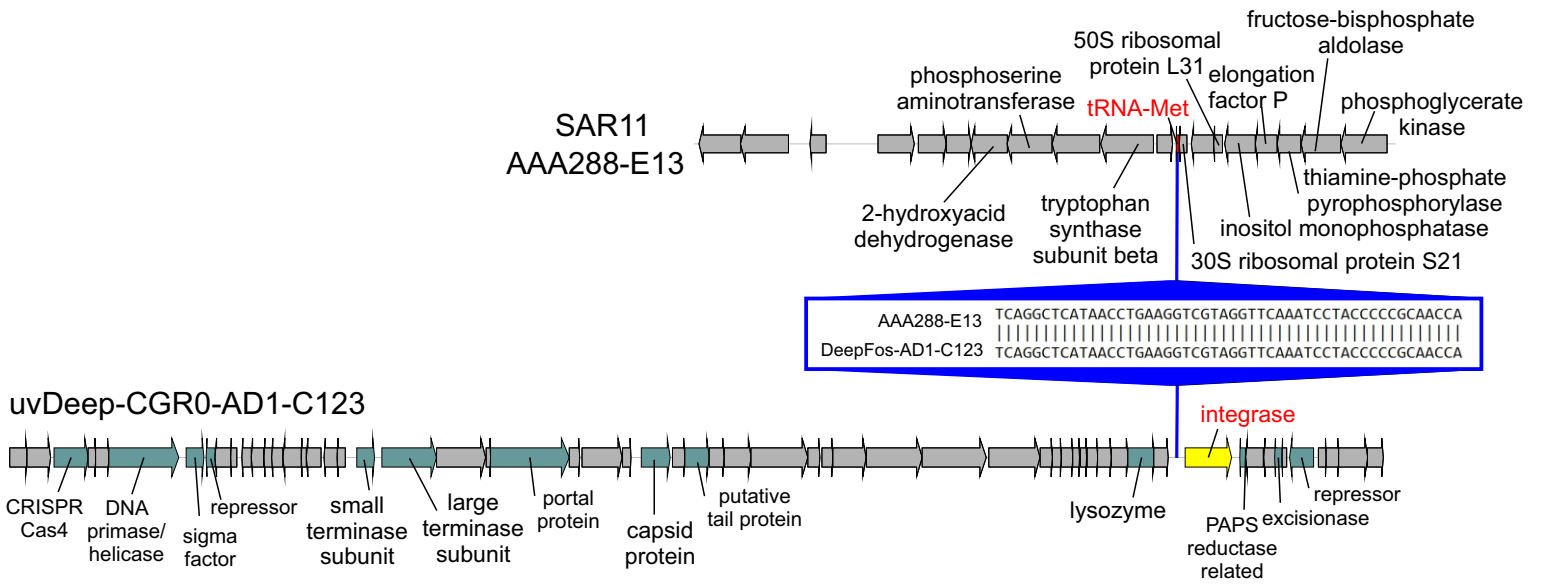

**FigS6.** Deep pelagiphage uvDeep-CGR0-AD1-C123 genome and the probable insertion point in the genome of the SAG SAR11 AAA288-E13.
