# Supplementary material for: Genomes of Abundant and Widespread Viruses from the Deep Ocean
Source: PubMed Central journal article supplement (PMC4981710; doi:10.1128/mbio.00805-16), 2016-07-26
Supplement: mbo004162901sf7.pdf [file mbo004162901sf7.pdf]

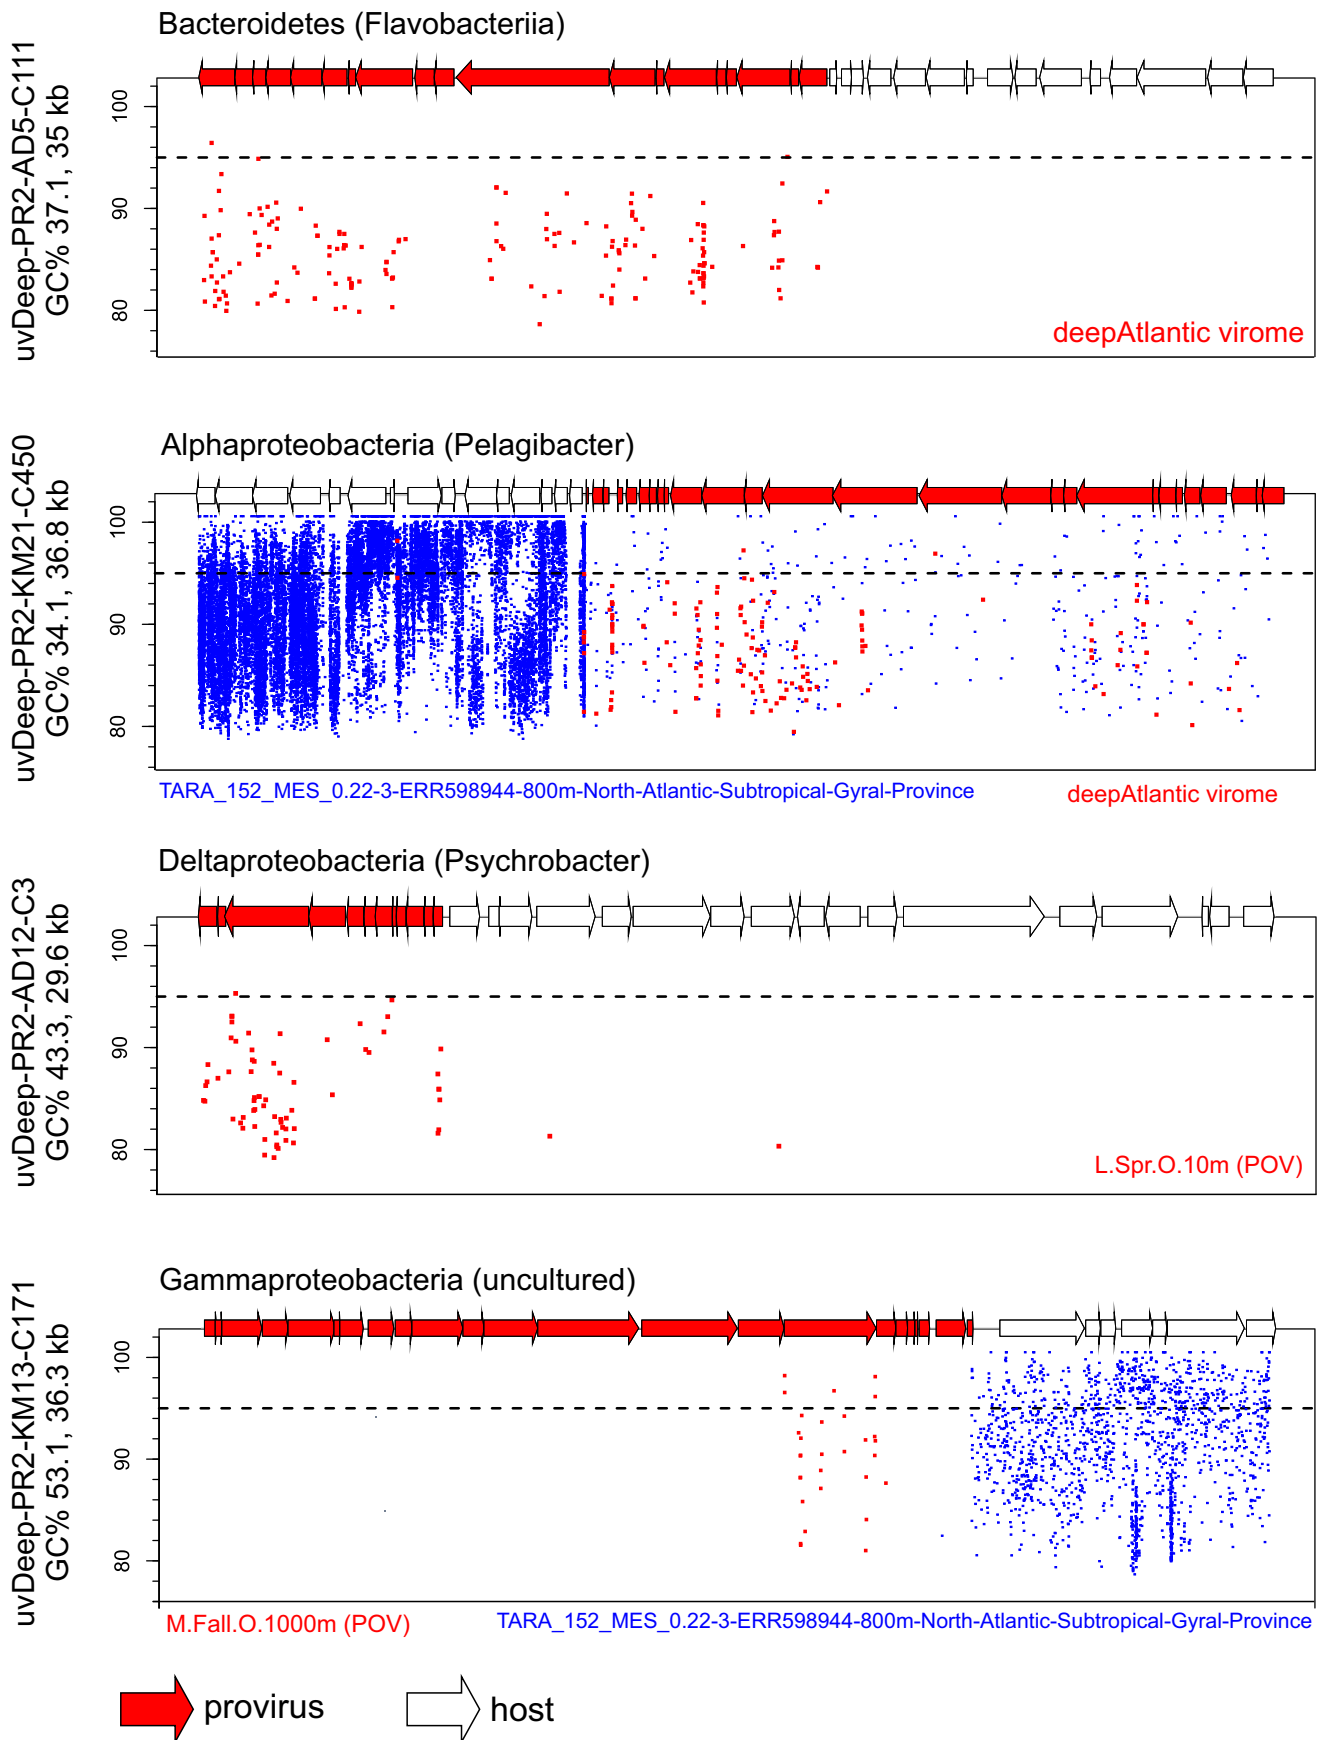

**FigS7.** Fragment recruitment plots of contigs representing proviruss of a Bacteroidetes, Alphaproteobacteria, Deltaproteobacteria and a Gammaproteobacteria from selected metaviromic and metagenomic datasets (name shown at bottom right). Percentage identity (nucleotides) is shown on the Y-axis and the reads are shown in blue (metagenomes) and red (viromes)
