# Supplementary material for: Genomes of Abundant and Widespread Viruses from the Deep Ocean
Source: PubMed Central journal article supplement (PMC4981710; doi:10.1128/mbio.00805-16), 2016-07-26
Supplement: mbo004162901st1.pdf [file mbo004162901st1.pdf]

**Table S1. Complete list of all phage contigs described in this study**

| name                      | length | %GC   | contig type      | Group  | phage type   | notes on host       |
|---------------------------|--------|-------|------------------|--------|--------------|---------------------|
| 1 uvDeep-CGR2-KM21-C338   | 34.1   | 61.94 | complete genome  |        | Caudovirales |                     |
| 2 uvDeep-CGR2-KM24-C26    | 41.3   | 61.47 | complete genome  |        | Caudovirales |                     |
| 3 uvDeep-CGR2-AD7-C12     | 38.0   | 58.56 | complete genome  |        | Caudovirales |                     |
| 4 uvDeep-CGR2-KM19-C37    | 36.9   | 58.54 | complete genome  |        | Caudovirales |                     |
| 5 uvDeep-CGR2-KM20-C133   | 34.9   | 60.49 | complete genome  |        | Caudovirales |                     |
| 6 uvDeep-CGR2-KM21-C88    | 36.0   | 58.89 | complete genome  |        | Caudovirales |                     |
| 7 uvDeep-CGR0-AD1-C239    | 34.0   | 49.39 | complete genome  | Group1 | Caudovirales |                     |
| 8 uvDeep-CGR0-KM14-C182   | 39.4   | 57.07 | complete genome  |        | Caudovirales |                     |
| 9 uvDeep-CGR0-KM15-C219   | 30.1   | 60.03 | complete genome  | Group1 | Caudovirales |                     |
| 10 uvDeep-CGR0-KM22-C158  | 29.8   | 60.48 | complete genome  | Group1 | Caudovirales |                     |
| 11 uvDeep-CGR2-KM18-C74   | 33.4   | 45.25 | complete genome  | Group1 | Caudovirales |                     |
| 12 uvDeep-CGR2-KM23-C198  | 32.2   | 53.35 | complete genome  | Group1 | Caudovirales |                     |
| 13 uvDeep-CGR2-AD12-C183  | 37.1   | 53.11 | complete genome  |        | Caudovirales |                     |
| 14 uvDeep-CGR2-AD3-C76    | 32.2   | 57.21 | complete genome  |        | Caudovirales |                     |
| 15 uvDeep-CGR2-KM23-C246  | 37.2   | 52.53 | complete genome  |        | Caudovirales |                     |
| 16 uvDeep-CGR2-KM18-C269  | 36.0   | 37.61 | complete genome  |        | Caudovirales |                     |
| 17 uvDeep-CGR2-AD3-C191   | 38.1   | 51.29 | complete genome  |        | Caudovirales |                     |
| 18 uvDeep-CGR2-KM24-C165  | 34.3   | 32.57 | complete genome  |        | Caudovirales | Alphaproteobacteria |
| 19 uvDeep-CGR2-KM21-C368  | 36.1   | 30.95 | complete genome  |        | Caudovirales |                     |
| 20 uvDeep-CGR2-AD10-C281  | 36.8   | 33.77 | complete genome  | Group3 | Caudovirales | Alphaproteobacteria |
| 21 uvDeep-CGR2-KM22-C255  | 40.4   | 33.01 | complete genome  | Group3 | Caudovirales | Alphaproteobacteria |
| 22 uvDeep-CGR0-AD1-C123   | 35.6   | 52.23 | complete genome  |        | Caudovirales | Alphaproteobacteria |
| 23 uvDeep-CGR2-AD8-C175   | 32.8   | 30.84 | complete genome  |        | Caudovirales | Alphaproteobacteria |
| 24 uvDeep1-CGR2-KM23-C896 | 33.1   | 30.18 | complete genome  | Group2 | Caudovirales |                     |
| 25 uvDeep-CGR1-KM17-C101  | 30.6   | 34.37 | complete genome  | Group2 | Caudovirales |                     |
| 26 uvDeep-CGR2-KM19-C269  | 36.5   | 30.66 | complete genome  |        | Caudovirales |                     |
| 27 uvDeep-CGR2-KM21-C345  | 31.6   | 34.13 | complete genome  |        | Caudovirales |                     |
| 28 uvDeep-CGR2-KM19-C184  | 38.9   | 47.88 | complete genome  |        | Caudovirales |                     |
| 29 uvDeep1-GF1-KM16-C1450 | 17.1   | 37.15 | genomic fragment |        | Caudovirales |                     |
| 30 uvDeep1-GF1-KM16-C1988 | 25.3   | 32.18 | genomic fragment |        | Caudovirales |                     |
| 31 uvDeep1-GF2-KM17-C43   | 34.8   | 38.45 | genomic fragment |        | Caudovirales |                     |
| 32 uvDeep1-GF2-KM23-C739  | 34.0   | 32.38 | genomic fragment |        | Caudovirales |                     |
| 33 uvDeep1-GF2-KM24-C1412 | 38.7   | 32.39 | genomic fragment |        | Caudovirales |                     |
| 34 uvDeep1-GF2-KM24-C880  | 38.0   | 35.44 | genomic fragment |        | Caudovirales |                     |
| 35 uvDeep-GF0-AD4-C224    | 28.0   | 55.42 | genomic fragment |        | Caudovirales |                     |
| 36 uvDeep-GF0-KM14-C84    | 12.7   | 63.15 | genomic fragment |        | Caudovirales |                     |
| 37 uvDeep-GF0-KM16-C193   | 24.6   | 32.81 | genomic fragment |        | Caudovirales |                     |
| 38 uvDeep-GF0-KM22-C355   | 22.9   | 52.34 | genomic fragment |        | Caudovirales |                     |
| 39 uvDeep-GF0-KM22-C365   | 18.5   | 52.1  | genomic fragment |        | Caudovirales |                     |
| 40 uvDeep-GF0-KM22-C456   | 27.9   | 38.39 | genomic fragment |        | Caudovirales |                     |
| 41 uvDeep-GF0-KM23-C175   | 25.2   | 33.48 | genomic fragment |        | Caudovirales |                     |
| 42 uvDeep-GF0-KM23-C230   | 26.2   | 39.72 | genomic fragment |        | Caudovirales |                     |
| 43 uvDeep-GF1-AD10-C169   | 17.6   | 59.87 | genomic fragment |        | Caudovirales |                     |
| 44 uvDeep-GF1-AD12-C99    | 21.0   | 62.24 | genomic fragment |        | Caudovirales |                     |
| 45 uvDeep-GF1-AD3-C39     | 34.0   | 41.91 | genomic fragment |        | Caudovirales |                     |
| 46 uvDeep-GF1-KM13-C123   | 23.5   | 48.58 | genomic fragment |        | Caudovirales |                     |
| 47 uvDeep-GF1-KM14-C251   | 31.6   | 30.96 | genomic fragment |        | Caudovirales |                     |
| 48 uvDeep-GF1-KM15-C111   | 38.1   | 62.87 | genomic fragment |        | Caudovirales |                     |
| 49 uvDeep-GF1-KM17-C231   | 27.6   | 34.68 | genomic fragment |        | Caudovirales |                     |
| 50 uvDeep-GF1-KM19-C324   | 10.8   | 31.69 | genomic fragment |        | Caudovirales |                     |
| 51 uvDeep-GF1-KM19-C325   | 25.4   | 30.16 | genomic fragment |        | Caudovirales |                     |
| 52 uvDeep-GF2-AD2-C105    | 35.9   | 36.57 | genomic fragment |        | Caudovirales |                     |

*continued...*

|    |                       |      |       |                  |                 |                     |
|----|-----------------------|------|-------|------------------|-----------------|---------------------|
| 53 | uvDeep-GF2-AD2-C266   | 31.3 | 52.51 | genomic fragment | Caudovirales    |                     |
| 54 | uvDeep-GF2-AD4-C139   | 38.0 | 33.93 | genomic fragment | Caudovirales    |                     |
| 55 | uvDeep-GF2-AD5-C185   | 29.6 | 49.48 | genomic fragment | Caudovirales    |                     |
| 56 | uvDeep-GF2-AD7-C162   | 39.1 | 32.36 | genomic fragment | Caudovirales    |                     |
| 57 | uvDeep-GF2-AD8-C17    | 40.9 | 41.52 | genomic fragment | Caudovirales    |                     |
| 58 | uvDeep-GF2-AD9-C225   | 38.5 | 62.71 | genomic fragment | Caudovirales    |                     |
| 59 | uvDeep-GF2-KM16-C11   | 44.6 | 57.52 | genomic fragment | Caudovirales    |                     |
| 60 | uvDeep-GF2-KM16-C276  | 27.7 | 36.6  | genomic fragment | Caudovirales    |                     |
| 61 | uvDeep-GF2-KM17-C119  | 38.4 | 36.87 | genomic fragment | Caudovirales    |                     |
| 62 | uvDeep-GF2-KM17-C191  | 32.8 | 38.2  | genomic fragment | Caudovirales    |                     |
| 63 | uvDeep-GF2-KM17-C202  | 40.4 | 53.68 | genomic fragment | Caudovirales    |                     |
| 64 | uvDeep-GF2-KM17-C23   | 34.7 | 39.22 | genomic fragment | Caudovirales    |                     |
| 65 | uvDeep-GF2-KM17-C280  | 43.1 | 46.04 | genomic fragment | Caudovirales    |                     |
| 66 | uvDeep-GF2-KM17-C342  | 38.4 | 35.28 | genomic fragment | Caudovirales    |                     |
| 67 | uvDeep-GF2-KM18-C120  | 38.8 | 35.5  | genomic fragment | Caudovirales    |                     |
| 68 | uvDeep-GF2-KM19-C237  | 41.7 | 53.11 | genomic fragment | Caudovirales    |                     |
| 69 | uvDeep-GF2-KM19-C266  | 38.3 | 34.13 | genomic fragment | Caudovirales    |                     |
| 70 | uvDeep-GF2-KM20-C144  | 35.4 | 33.72 | genomic fragment | Caudovirales    |                     |
| 71 | uvDeep-GF2-KM20-C152  | 37.8 | 35.46 | genomic fragment | Caudovirales    |                     |
| 72 | uvDeep-GF2-KM21-C220  | 38.0 | 34.11 | genomic fragment | Caudovirales    |                     |
| 73 | uvDeep-GF2-KM21-C24   | 39.7 | 45.96 | genomic fragment | Caudovirales    |                     |
| 74 | uvDeep-GF2-KM24-C13   | 38.1 | 57.99 | genomic fragment | Caudovirales    |                     |
| 75 | uvDeep-GF2-KM24-C45   | 34.4 | 58.86 | genomic fragment | Caudovirales    |                     |
| 76 | uvDeep-GF1-KM20-C130  | 42.0 | 45.21 | genomic fragment | Iridoviridae    |                     |
| 77 | uvDeep-GF0-AD7-C222   | 18.8 | 39.24 | genomic fragment | Phycodnaviridae |                     |
| 78 | uvDeep-GF0-AD7-C352   | 20.1 | 30.95 | genomic fragment | Phycodnaviridae |                     |
| 79 | uvDeep-GF1-AD7-C368   | 12.5 | 31.38 | genomic fragment | Phycodnaviridae |                     |
| 80 | uvDeep-GF1-AD8-C180   | 19.8 | 31.78 | genomic fragment | Phycodnaviridae |                     |
| 81 | uvDeep-GF1-AD8-C225   | 15.0 | 29.91 | genomic fragment | Phycodnaviridae |                     |
| 82 | uvDeep-GF1-KM14-C107  | 20.4 | 36.92 | genomic fragment | Phycodnaviridae |                     |
| 83 | uvDeep-GF1-KM14-C171  | 18.7 | 34.08 | genomic fragment | Phycodnaviridae |                     |
| 84 | uvDeep-GF1-KM18-C241  | 10.6 | 36.09 | genomic fragment | Phycodnaviridae |                     |
| 85 | uvDeep-GF1-KM18-C254  | 12.9 | 41    | genomic fragment | Phycodnaviridae |                     |
| 86 | uvDeep-GF1-KM20-C124  | 25.5 | 43.53 | genomic fragment | Phycodnaviridae |                     |
| 87 | uvDeep-GF1-KM20-C172  | 15.7 | 46.11 | genomic fragment | Phycodnaviridae |                     |
| 88 | uvDeep-GF0-KM14-C328  | 35.7 | 33.97 | genomic fragment | Phycodnaviridae |                     |
| 89 | uvDeep1-PR2-KM20-C396 | 38.5 | 31.85 | provirus         | Caudovirales    | Alphaproteobacteria |
| 90 | uvDeep-PR0-KM13-C18   | 30.5 | 57.84 | provirus         | Caudovirales    | Planctomycetes      |
| 91 | uvDeep-PR1-AD12-C247  | 35.2 | 52.62 | provirus         | Caudovirales    | Alphaproteobacteria |
| 92 | uvDeep-PR1-KM20-C273  | 34.4 | 32.04 | provirus         | Caudovirales    | Alphaproteobacteria |
| 93 | uvDeep-PR2-AD12-C3    | 29.6 | 43.32 | provirus         | Caudovirales    | Gammaproteobacteria |
| 94 | uvDeep-PR2-AD5-C111   | 35.1 | 37.19 | provirus         | Caudovirales    | Bacteroidetes       |
| 95 | uvDeep-PR2-KM13-C171  | 36.3 | 53.14 | provirus         | Caudovirales    | Gammaproteobacteria |
| 96 | uvDeep-PR2-KM14-C49   | 37.3 | 31.93 | provirus         | Caudovirales    | Alphaproteobacteria |
| 97 | uvDeep-PR2-KM21-C450  | 36.9 | 34.12 | provirus         | Caudovirales    | Alphaproteobacteria |
| 98 | uvDeep-PR2-KM22-C70   | 36.7 | 34.14 | provirus         | Caudovirales    | Alphaproteobacteria |
